# Supplementary material
Source: PubMed Central journal article supplement (PMC10198894)
Supplement: NIHMS1868792-supplement-supinfo.pdf [file NIHMS1868792-supplement-supinfo.pdf]

## **Body Weight and Fat Trajectories of Black and White Women in the First Year Postpartum**

Xuwen Wang,<sup>1</sup> Erin E. Kishman,<sup>1</sup> Jihong Liu<sup>2</sup>, Lauren A. Castleberry,<sup>3,4</sup> Alexander McLain,<sup>2</sup> Joshua R. Sparks,<sup>5</sup> James W. Cook<sup>4</sup>

<sup>1</sup>Department of Exercise Science, University of South Carolina School of Public Health, Columbia, SC; <sup>2</sup>Department of Epidemiology and Biostatistics, University of South Carolina School of Public Health, Columbia, SC; <sup>3</sup>Department of Obstetrics and Gynecology, Lexington Medical Center, West Columbia, SC; <sup>4</sup>Department of Obstetrics and Gynecology, University of South Carolina School of Medicine, Columbia, SC; <sup>5</sup>Reproductive Endocrinology and Women's Health Laboratory, Pennington Biomedical Research Center, Louisiana State University, Baton Rouge, LA;

**Running title: Postpartum Fat changes in Black and White Women**

**Correspondence:** Xuwen Wang, PhD, Department of Exercise Science, University of South Carolina, 921 Assembly St., PHRC 301, Columbia, SC 29208. Email: [xwang@sc.edu](mailto:xwang@sc.edu)

Table S1. Weight, waist and hip circumferences, and body composition (by dual-energy X-ray absorptiometry) during the first year postpartum by race. Weight at 6-8 weeks postpartum and other covariates were adjusted.

|                                | Black                   |                            |                                                          | White                    |                            |                                                          |
|--------------------------------|-------------------------|----------------------------|----------------------------------------------------------|--------------------------|----------------------------|----------------------------------------------------------|
|                                | Mean (SE)               | P values,<br>overall trend | P values,<br>compared with<br>the previous<br>time point | Mean (SE)                | P values,<br>overall trend | P values,<br>compared with<br>the previous time<br>point |
| <b>Weight, kg</b>              |                         | 0.280                      |                                                          |                          | <0.001                     |                                                          |
| 6-8 weeks                      | 85.7 (1.2)              |                            |                                                          | 77.3 (1.1)               |                            |                                                          |
| 6 months                       | 85.9 (1.4)              |                            | 0.869                                                    | 75.2 (1.1)               |                            | <0.001                                                   |
| 12 months                      | 87.9 (1.6)              |                            | 0.185                                                    | 74.1 (1.2) <sup>a</sup>  |                            | 0.064                                                    |
| <b>Waist circumference, cm</b> |                         | 0.015                      |                                                          |                          | 0.017                      |                                                          |
| 6-8 weeks                      | 93.2 (1.9)              |                            |                                                          | 90.3 (1.9)               |                            |                                                          |
| 6 months                       | 95.9 (2.0)              |                            | 0.056                                                    | 88.0 (1.9)               |                            | 0.004                                                    |
| 12 months                      | 98.0 (2.2) <sup>b</sup> |                            | 0.204                                                    | 88.7 (1.9)               |                            | 0.454                                                    |
| <b>Hip circumference, cm</b>   |                         | 0.152                      |                                                          |                          | <0.001                     |                                                          |
| 6-8 weeks                      | 111.5 (1.2)             |                            |                                                          | 109.8 (1.6)              |                            |                                                          |
| 6 months                       | 111.8 (1.3)             |                            | 0.773                                                    | 107.5 (1.6)              |                            | <0.001                                                   |
| 12 months                      | 113.8 (1.5)             |                            | 0.110                                                    | 106.8 (1.6) <sup>a</sup> |                            | 0.335                                                    |
| <b>Fat mass, kg</b>            |                         | 0.196                      |                                                          |                          | <0.001                     |                                                          |
| 6-8 weeks                      | 34.5 (1.5)              |                            |                                                          | 29.8 (1.2)               |                            |                                                          |
| 6 months                       | 35.9 (1.6)              |                            | 0.196                                                    | 28.2 (1.2)               |                            | <0.001                                                   |
| 12 months                      | 36.7 (1.8)              |                            | 0.538                                                    | 27.2 (1.3) <sup>a</sup>  |                            | 0.062                                                    |
| <b>Lean mass, kg</b>           |                         | 0.332                      |                                                          |                          | <0.001                     |                                                          |
| 6-8 weeks                      | 48.4 (1.0)              |                            |                                                          | 45.1 (1.0)               |                            |                                                          |
| 6 months                       | 47.9 (1.1)              |                            | 0.274                                                    | 44.4 (1.0)               |                            | <0.001                                                   |
| 12 months                      | 48.5 (1.1)              |                            | 0.186                                                    | 44.2 (1.0) <sup>a</sup>  |                            | 0.223                                                    |
| <b>Body fat, %</b>             |                         | 0.681                      |                                                          |                          | <0.001                     |                                                          |
| 6-8 weeks                      | 38.7 (1.2)              |                            |                                                          | 37.9 (1.4)               |                            |                                                          |
| 6 months                       | 39.3 (1.3)              |                            | 0.425                                                    | 36.6 (1.4)               |                            | <0.001                                                   |
| 12 months                      | 39.3 (1.4)              |                            | 0.993                                                    | 35.8 (1.4) <sup>a</sup>  |                            | 0.038                                                    |
| <b>Appendicular fat, kg</b>    |                         | 0.438                      |                                                          |                          | <0.001                     |                                                          |
| 6-8 weeks                      | 16.7 (0.9)              |                            |                                                          | 13.8 (0.7)               |                            |                                                          |

|                                     |                         |              |       |                         |                  |
|-------------------------------------|-------------------------|--------------|-------|-------------------------|------------------|
| 6 months                            | 17.4 (1.0)              |              | 0.227 | 12.9 (0.7)              | <0.001           |
| 12 months                           | 17.3 (1.0)              |              | 0.926 | 12.1 (0.7) <sup>a</sup> | 0.004            |
| <b>Trunk fat, kg</b>                |                         | <b>0.134</b> |       |                         | <b>0.016</b>     |
| 6-8 weeks                           | 16.9 (0.9)              |              |       | 14.9 (0.8)              |                  |
| 6 months                            | 17.7 (1.0)              |              | 0.240 | 14.3 (0.8)              | 0.010            |
| 12 months                           | 18.4 (1.1) <sup>c</sup> |              | 0.311 | 14.0 (0.8) <sup>c</sup> | 0.419            |
| <b>Android fat, gm</b>              |                         | <b>0.164</b> |       |                         | <b>0.001</b>     |
| 6-8 weeks                           | 2764 (194)              |              |       | 2445 (171)              |                  |
| 6 months                            | 2903 (204)              |              | 0.253 | 2256 (170)              | <0.001           |
| 12 months                           | 3033 (218)              |              | 0.334 | 2226 (176) <sup>b</sup> | 0.600            |
| <b>Gynoid fat, gm</b>               |                         | <b>0.806</b> |       |                         | <b>&lt;0.001</b> |
| 6-8 weeks                           | 6063 (327)              |              |       | 5628 (274)              |                  |
| 6 months                            | 6098 (347)              |              | 0.877 | 5105 (273)              | <0.001           |
| 12 months                           | 6229 (374)              |              | 0.605 | 4987 (282) <sup>a</sup> | 0.219            |
| <b>*Visceral adipose tissue, gm</b> |                         | <b>0.022</b> |       |                         | <b>0.458</b>     |
| 6-8 weeks                           | 668 (67)                |              |       | 602 (82)                |                  |
| 6 months                            | 698 (70)                |              | 0.466 | 573 (83)                | 0.217            |
| 12 months                           | 809 (77) <sup>b</sup>   |              | 0.024 | 583 (85)                | 0.690            |

Means are least squares means from mixed-effects models. Weight at 6-8 weeks postpartum, parity, household income, education, spouse, Pittsburgh Sleep Quality Index score, breastfeeding, smoking, and physical activity were adjusted in the models. The visits at 6 and 12 months were within 4 weeks after the respective postpartum time point. Sample size for visceral adipose tissue (VAT): 43, 26, and 18 Black women, and 81, 70, and 54 White women, at 6-8 weeks, 6 months, and 12 months, respectively. <sup>a</sup>,  $p \leq 0.0001$ ; <sup>b</sup>,  $p < 0.01$ ; <sup>c</sup>,  $p < 0.05$ , compared to 6-8 weeks.

Table S2. Weight, waist and hip circumferences, and body composition (by dual-energy X-ray absorptiometry) during the first year postpartum by race. Pre-pregnancy weight and other covariates were adjusted.

|                                | Black                   |                            |                                                          | White                    |                            |                                                          |
|--------------------------------|-------------------------|----------------------------|----------------------------------------------------------|--------------------------|----------------------------|----------------------------------------------------------|
|                                | Mean (SE)               | P values,<br>overall trend | P values,<br>compared with<br>the previous<br>time point | Mean (SE)                | P values,<br>overall trend | P values,<br>compared with<br>the previous<br>time point |
| <b>Body weight, kg</b>         |                         | 0.489                      |                                                          |                          | <0.001                     |                                                          |
| 6-8 weeks                      | 85.5 (1.0)              |                            |                                                          | 76.6 (0.7)               |                            |                                                          |
| 6 months                       | 85.3 (1.2)              |                            | 0.885                                                    | 74.4 (0.7)               |                            | <0.001                                                   |
| 12 months                      | 87.1 (1.4)              |                            | 0.263                                                    | 73.0 (0.8) <sup>a</sup>  |                            | 0.027                                                    |
| <b>Waist circumference, cm</b> |                         | 0.043                      |                                                          |                          | 0.035                      |                                                          |
| 6-8 weeks                      | 92.2 (1.2)              |                            |                                                          | 88.6 (0.8)               |                            |                                                          |
| 6 months                       | 94.6 (1.4)              |                            | 0.110                                                    | 86.5 (0.7)               |                            | 0.010                                                    |
| 12 months                      | 96.5 (1.6) <sup>c</sup> |                            | 0.265                                                    | 87.2 (0.9)               |                            | 0.426                                                    |
| <b>Hip circumference, cm</b>   |                         | 0.237                      |                                                          |                          | 0.001                      |                                                          |
| 6-8 weeks                      | 113.6 (0.9)             |                            |                                                          | 108.5 (0.8)              |                            |                                                          |
| 6 months                       | 113.7 (1.0)             |                            | 0.944                                                    | 106.1 (0.7)              |                            | <0.001                                                   |
| 12 months                      | 115.5 (1.2)             |                            | 0.134                                                    | 105.0 (0.9) <sup>a</sup> |                            | 0.114                                                    |
| <b>Fat mass, kg</b>            |                         | 0.384                      |                                                          |                          | <0.001                     |                                                          |
| 6-8 weeks                      | 35.3 (0.9)              |                            |                                                          | 30.4 (0.7)               |                            |                                                          |
| 6 months                       | 36.4 (1.1)              |                            | 0.354                                                    | 28.8 (0.6)               |                            | 0.001                                                    |
| 12 months                      | 37.1 (1.2)              |                            | 0.595                                                    | 27.7 (0.7) <sup>a</sup>  |                            | 0.030                                                    |
| <b>Lean mass, kg</b>           |                         | 0.283                      |                                                          |                          | <0.001                     |                                                          |
| 6-8 weeks                      | 47.3 (0.5)              |                            |                                                          | 43.7 (0.3)               |                            |                                                          |
| 6 months                       | 46.7 (0.6)              |                            | 0.152                                                    | 43.0 (0.3)               |                            | <0.001                                                   |
| 12 months                      | 47.2 (0.6)              |                            | 0.249                                                    | 42.7 (0.4) <sup>a</sup>  |                            | 0.116                                                    |
| <b>Body fat, %</b>             |                         | 0.788                      |                                                          |                          | <0.001                     |                                                          |
| 6-8 weeks                      | 39.8 (0.7)              |                            |                                                          | 38.7 (0.6)               |                            |                                                          |
| 6 months                       | 40.3 (0.8)              |                            | 0.542                                                    | 37.5 (0.6)               |                            | <0.001                                                   |
| 12 months                      | 40.3 (0.9)              |                            | 0.970                                                    | 36.6 (0.6) <sup>a</sup>  |                            | 0.024                                                    |
| <b>Appendicular fat, kg</b>    |                         | 0.443                      |                                                          |                          | <0.001                     |                                                          |
| 6-8 weeks                      | 17.6 (0.5)              |                            |                                                          | 14.5 (0.3)               |                            |                                                          |

|                                     |                       |              |       |                         |                  |
|-------------------------------------|-----------------------|--------------|-------|-------------------------|------------------|
| 6 months                            | 18.4 (0.6)            |              | 0.224 | 13.6 (0.3)              | <0.001           |
| 12 months                           | 18.2 (0.7)            |              | 0.872 | 12.7 (0.4) <sup>a</sup> | <0.001           |
| <b>Trunk fat, kg</b>                |                       | <b>0.291</b> |       |                         | <b>0.023</b>     |
| 6-8 weeks                           | 16.5 (0.5)            |              |       | 14.9 (0.4)              |                  |
| 6 months                            | 17.0 (0.6)            |              | 0.470 | 14.3 (0.4)              | 0.012            |
| 12 months                           | 17.7 (0.7)            |              | 0.337 | 14.1 (0.4) <sup>c</sup> | 0.462            |
| <b>Android fat, gm</b>              |                       | <b>0.421</b> |       |                         | <b>0.002</b>     |
| 6-8 weeks                           | 2551 (105)            |              |       | 2441 (77)               |                  |
| 6 months                            | 2628 (122)            |              | 0.527 | 2255 (75)               | <0.001           |
| 12 months                           | 2734 (136)            |              | 0.430 | 2222 (84) <sup>b</sup>  | 0.577            |
| <b>Gynoid fat, gm</b>               |                       | <b>0.954</b> |       |                         | <b>&lt;0.001</b> |
| 6-8 weeks                           | 6266 (178)            |              |       | 5649 (130)              |                  |
| 6 months                            | 6266 (211)            |              | 1.000 | 5118 (128)              | <0.001           |
| 12 months                           | 6335 (238)            |              | 0.783 | 4971 (143) <sup>a</sup> | 0.139            |
| <b>*Visceral adipose tissue, gm</b> |                       | <b>0.063</b> |       |                         | <b>0.476</b>     |
| 6-8 weeks                           | 485 (34)              |              |       | 564 (32)                |                  |
| 6 months                            | 485 (40)              |              | 0.998 | 535 (31)                | 0.225            |
| 12 months                           | 590 (46) <sup>c</sup> |              | 0.032 | 542 (35)                | 0.778            |

Means are least squares means from mixed-effects models. Pre-pregnancy weight, parity, household income, education, spouse, Pittsburgh Sleep Quality Index score, breastfeeding status, smoking status, and physical activity were adjusted in the models. The visits at 6 and 12 months were within 4 weeks after the respective postpartum time point. \*, Sample size for visceral adipose tissue (VAT): 43, 26, and 18 Black women, and 81, 70, and 54 White women, at 6-8 weeks, 6 months, and 12 months, respectively. <sup>a</sup>,  $p \leq 0.0001$ ; <sup>b</sup>,  $p < 0.01$ ; <sup>c</sup>,  $p < 0.05$ , compared to 6-8 weeks.

Table S3. Significant associations ( $p < 0.05$ ) between covariates of sociodemographic, behavioral, and lifestyle factors and outcomes of weight and body composition in the adjusted mixed-effects models in Black women.

| <b>Black</b>            | <b>Parity</b>    | <b>Household income</b> | <b>Education</b>                                 | <b>Spouse</b>                     | <b>PSQI</b> | <b>Breastfeeding status</b> | <b>Smoking status</b>                                        | <b>Physical activity, counts per minute</b> |
|-------------------------|------------------|-------------------------|--------------------------------------------------|-----------------------------------|-------------|-----------------------------|--------------------------------------------------------------|---------------------------------------------|
| <b>Reference</b>        | <b>Primipara</b> | <b>≤\$40k</b>           | <b>Grade 12 or lower</b>                         | <b>Living with spouse</b>         | --          | <b>Not breastfeeding</b>    | <b>Never smoking</b>                                         | --                                          |
| Weight, kg              |                  |                         |                                                  |                                   |             |                             |                                                              |                                             |
| Waist circumference, cm |                  |                         |                                                  |                                   |             |                             |                                                              | -0.015 (0.006)                              |
| Hip circumference, cm   |                  |                         | *Ref: Some colleague Graduate school: -5.0 (1.6) |                                   |             |                             | History of smoking: -4.8 (1.8)                               | -0.011 (0.004)                              |
| Fat mass, kg            |                  |                         |                                                  |                                   |             |                             |                                                              |                                             |
| Lean mass, kg           |                  | \$60-80k: 3.0 (1.5)     |                                                  | Not living with spouse: 2.8 (1.3) |             |                             |                                                              |                                             |
| Body fat, %             |                  |                         |                                                  |                                   |             |                             |                                                              | -0.009 (0.0034)                             |
| Appendicular fat, gm    |                  |                         |                                                  |                                   |             |                             |                                                              |                                             |
| Trunk fat, kg           |                  |                         |                                                  |                                   |             |                             |                                                              |                                             |
| Android fat, gm         |                  |                         |                                                  |                                   |             |                             | Currently smoking: 873 (375)                                 |                                             |
| Gynoid fat, gm          |                  |                         |                                                  |                                   |             |                             |                                                              |                                             |
| VAT, gm                 |                  |                         | Some college: -184 (85)                          |                                   | 22.6 (6.5)  |                             | History of smoking: 203 (89)<br>Currently smoking: 502 (120) |                                             |

Data are regression coefficients (SE). VAT, visceral adipose tissue. PSQI, Pittsburgh Sleep Quality Index. Covariates adjusted in the models include pre-pregnancy weight, weight retention at 6-8 weeks postpartum (weight at 6-8 weeks minus pre-pregnancy weight), parity, household income, education, spouse, Pittsburgh Sleep Quality Index score, breastfeeding status, smoking status, and physical activity. Associations of pre-pregnancy weight and weight retained at 6-8 weeks postpartum with outcome variables are not reported in this table. \*Ref, reference level used in this comparison is some college.

Table S4. Significant associations ( $p < 0.05$ ) between covariates of sociodemographic, behavioral, and lifestyle factors and outcomes of weight and body composition in the adjusted mixed-effects models in White women.

| White                   | Parity                   | Household income                           | Education                                             | Spouse             | PSQI | Breastfeeding status    | Smoking status               | Physical activity, counts per minute |
|-------------------------|--------------------------|--------------------------------------------|-------------------------------------------------------|--------------------|------|-------------------------|------------------------------|--------------------------------------|
| Reference               | Primipara                | ≤\$40k                                     | Grade 12 or lower                                     | Living with spouse | --   | Not breastfeeding       | Never smoking                | --                                   |
| Body weight, kg         |                          |                                            |                                                       |                    |      |                         |                              |                                      |
| Waist circumference, cm | Not primipara: 2.4 (1.1) |                                            |                                                       |                    |      |                         |                              |                                      |
| Hip circumference, cm   |                          |                                            |                                                       |                    |      | Exclusive: -1.96 (0.90) |                              |                                      |
| Fat mass, kg            |                          | >\$80k: -3.0 (1.1)                         |                                                       |                    |      |                         |                              |                                      |
| Lean mass, kg           |                          | \$60-80k: 2.7 (1.1)<br>>\$80k: 2.7 (0.9)   |                                                       |                    |      |                         |                              | 1.68 (0.76)                          |
| Body fat, %             |                          | >\$80k: -3.0 (1.3)                         |                                                       |                    |      |                         |                              |                                      |
| Appendicular fat, kg    |                          | >\$80k: -1.4 (0.7)                         | Some college: 2.3 (1.1)<br>Graduate school: 2.9 (1.2) |                    |      | Exclusive: -0.7 (0.3)   |                              |                                      |
| Trunk fat, kg           | 1.2 (0.5)                | >\$80k: -1.6 (0.7)                         |                                                       |                    |      |                         |                              |                                      |
| Android fat, gm         |                          | \$60-80k: -441 (199)<br>>\$80k: -351 (160) |                                                       |                    |      |                         |                              |                                      |
| Gynoid fat, gm          |                          |                                            | Graduate school: 973 (478)                            |                    |      | Exclusive: -272 (134)   |                              |                                      |
| VAT, gm                 |                          | \$60-80k: -252 (95)<br>>\$80k: -199 (77)   |                                                       |                    |      |                         | Currently smoking: 355 (134) |                                      |

Data are regression coefficients (SE). VAT, visceral adipose tissue. PSQI, Pittsburgh Sleep Quality Index. Covariates adjusted in the models include pre-pregnancy weight, weight retention at 6-8 weeks postpartum (weight at 6-8 weeks minus pre-pregnancy weight), parity, household income, education, spouse, Pittsburgh Sleep Quality Index score, breastfeeding status, smoking status, and physical activity. Associations of pre-pregnancy weight and weight retained at 6-8 weeks postpartum with outcome variables are not reported in this table.
